# Supplementary material for: Cropland expansion drives vegetation greenness decline in Southeast Asia
Source: Copernicus journal article supplement (doi:10.5194/egusphere-2024-378), 2024-02-27
Supplement: Supplementary file 1 [file egusphere-2024-378-supplement.pdf]

1 **Supplementary Files**

2

3 **Cropland expansion drives vegetation greenness decline in**  
4 **Southeast Asia**

5 Ruiying Zhao<sup>1\*</sup>, Xiangzhong Luo<sup>1,2\*</sup>, Yuheng Yang<sup>1</sup>, Luri Nurlaila Syahid<sup>1</sup>, Chi Chen<sup>3</sup>,  
6 Janice Ser Huay Lee<sup>4</sup>

7 <sup>1</sup>Department of Geography, National University of Singapore, 117570, Singapore

8 <sup>2</sup>Center for Nature-based Climate Solutions, Department of Biological Sciences, National University of  
9 Singapore, 117558, Singapore

10 <sup>3</sup>Department of Ecology, Evolution, and Natural Resources, School of Environmental and Biological  
11 Sciences, Rutgers University, New Brunswick, NJ 08901, USA

12 <sup>4</sup>Asian School of the Environment and Earth Observatory of Singapore, Nanyang Technological  
13 University, 637459, Singapore

14

15 *Correspondence to:* Ruiying Zhao ([ruiying@nus.edu.sg](mailto:ruiying@nus.edu.sg)); Xiangzhong Luo ([xzluo.remi@nus.edu.sg](mailto:xzluo.remi@nus.edu.sg))

16

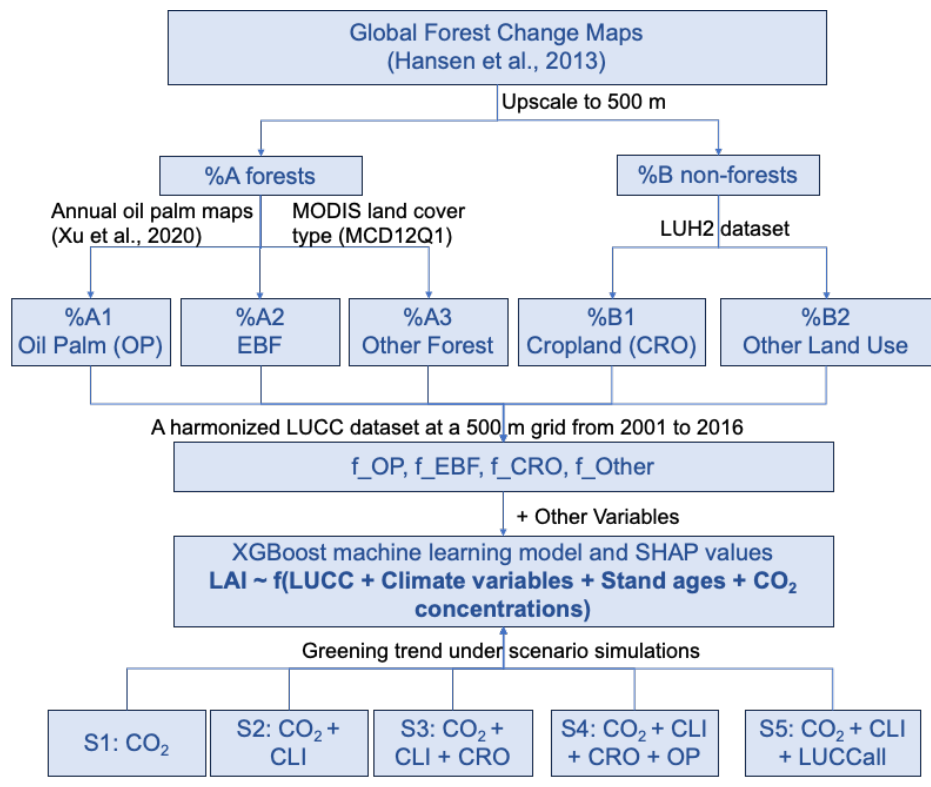

17  
18  
19

**Figure S1: Workflow of the harmonization of land-use dataset and conduction of scenario-based simulations in this study.**

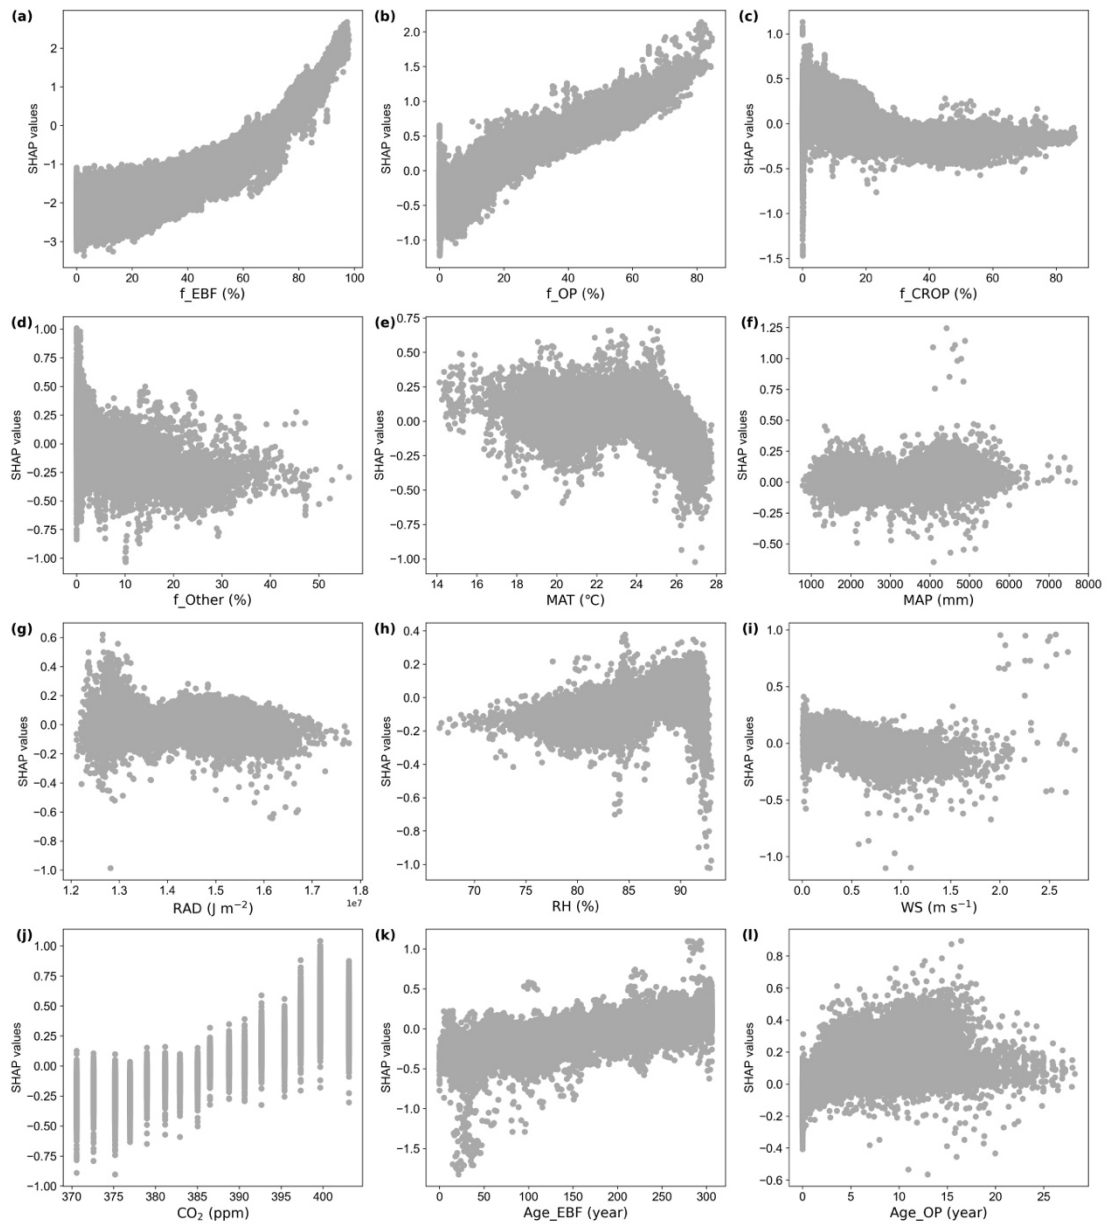

20

21 **Figure S2: Scatter plots of the SHAP values of each factor.**

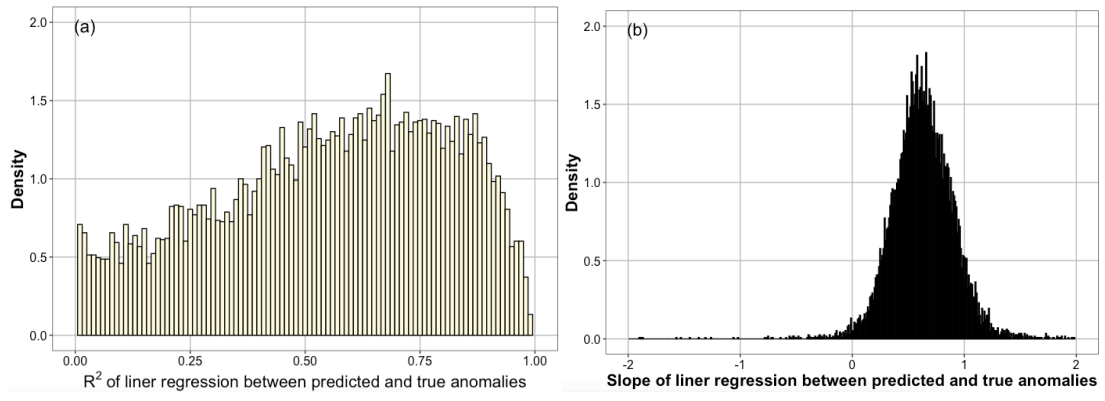

22

23

24

**Figure S3: Histogram of  $R^2$  (a) and slope (b) for linear regression between anomalies of predicted LAI and observed LAI.**

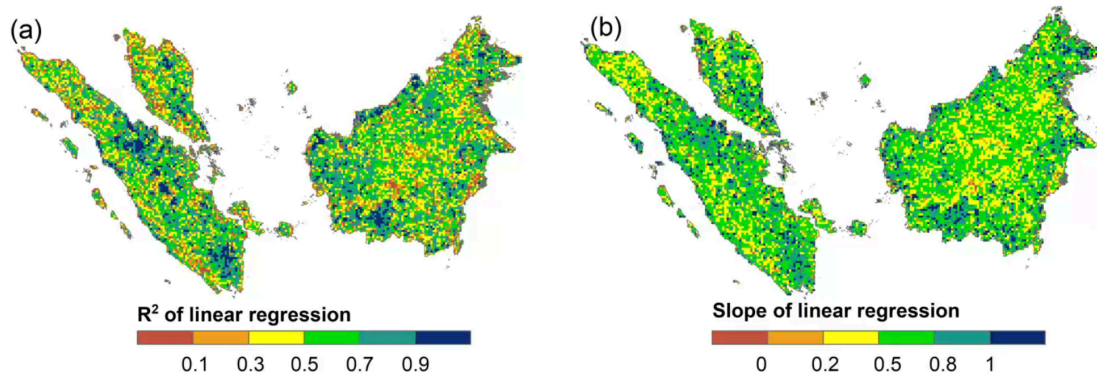

25

26

27

**Figure S4: Spatial distribution of  $R^2$  (a) and slope (b) for pixel-wise linear regression between anomalies of predicted LAI and observed LAI.**

28 **Table S1: The details of land use datasets in our study used to generate harmonized land uses in Southeast**  
 29 **Asia.**

| <b>Datasets</b>                         | <b>Time span</b> | <b>Spatial resolution</b> | <b>Sources</b>                                                                                                                                      |
|-----------------------------------------|------------------|---------------------------|-----------------------------------------------------------------------------------------------------------------------------------------------------|
| Global Forest Change maps (GFC)         | 2000-2022        | 30 m × 30 m               | Hansen et al., 2013;<br><a href="https://glad.earthengine.app/view/global-forest-change">https://glad.earthengine.app/view/global-forest-change</a> |
| Land-use harmonization datasets (LUH2)  | 0850-2019        | 0.25° × 0.25°             | Chini et al., 2021;<br><a href="https://luh.umd.edu/data.shtml">https://luh.umd.edu/data.shtml</a>                                                  |
| MODIS Land Cover Type Product (MCD12Q1) | 2001-2000        | 500 m × 500 m             | <a href="https://lpdaac.usgs.gov/products/mcd12q1v006/">https://lpdaac.usgs.gov/products/mcd12q1v006/</a>                                           |
| Annual oil palm area dataset (AOPD)     | 2001-2016        | 100 m × 100 m             | Xu et al., 2020;<br><a href="https://doi.org/10.5281/zenodo.3467071">https://doi.org/10.5281/zenodo.3467071</a>                                     |

30

31 **Table S2: The annual fractions of each land use type in our study area from 2001 to 2016 (%).**

| <b>Land Uses</b> | <b>2001</b> | <b>2002</b> | <b>2003</b> | <b>2004</b> | <b>2005</b> | <b>2006</b> | <b>2007</b> | <b>2008</b> | <b>2009</b> | <b>2010</b> | <b>2011</b> | <b>2012</b> | <b>2013</b> | <b>2014</b> | <b>2015</b> | <b>2016</b> |
|------------------|-------------|-------------|-------------|-------------|-------------|-------------|-------------|-------------|-------------|-------------|-------------|-------------|-------------|-------------|-------------|-------------|
| EBF              | 73.41       | 72.67       | 71.92       | 70.83       | 69.76       | 68.57       | 66.97       | 65.46       | 63.77       | 62.82       | 61.66       | 59.84       | 58.67       | 57.01       | 55.84       | 53.09       |
| CRO              | 14.45       | 14.69       | 14.94       | 15.57       | 15.81       | 16.37       | 16.97       | 17.57       | 18.53       | 19.13       | 19.80       | 20.82       | 21.50       | 22.53       | 23.31       | 24.56       |
| OP               | 3.91        | 4.44        | 5.06        | 5.50        | 5.96        | 6.45        | 7.31        | 8.10        | 8.65        | 9.03        | 9.37        | 9.81        | 10.31       | 10.67       | 10.85       | 12.05       |
| Pasture          | 3.20        | 3.20        | 3.04        | 3.01        | 3.24        | 3.30        | 3.38        | 3.44        | 3.51        | 3.49        | 3.55        | 3.73        | 3.68        | 3.78        | 3.84        | 3.98        |
| Grass            | 0.63        | 0.64        | 0.62        | 0.62        | 0.65        | 0.66        | 0.67        | 0.67        | 0.69        | 0.70        | 0.71        | 0.74        | 0.74        | 0.76        | 0.77        | 0.79        |
| Other Forest     | 0.08        | 0.02        | 0.02        | 0.03        | 0.04        | 0.07        | 0.04        | 0.04        | 0.04        | 0.02        | 0.02        | 0.03        | 0.03        | 0.04        | 0.04        | 0.03        |

32 Note: EBF, CROP, and OP are short for evergreen broadleaf forests, croplands, and oil palm plantations, respectively.

**Table S3: The variables used to explain LAI variations using XGBoost model.**

| Categories                     | Variables | Descriptions and Units                                      | Sources                                                                                             |
|--------------------------------|-----------|-------------------------------------------------------------|-----------------------------------------------------------------------------------------------------|
| Land use types                 | f_EBF     | Fraction of evergreen broadleaf forest in the grid cell (%) | see Methods                                                                                         |
|                                | f_OP      | Fraction of oil palm in the grid cell (%)                   |                                                                                                     |
|                                | f_CRO     | Fraction of cropland in the grid cell (%)                   |                                                                                                     |
|                                | f_Other   | Fraction of other land uses in the grid cell (%)            |                                                                                                     |
| Climate variables              | MAT       | Mean annual temperature (°C)                                | <a href="https://cds.climate.copernicus.eu/">https://cds.climate.copernicus.eu/</a>                 |
|                                | MAP       | Total annual precipitation (mm)                             |                                                                                                     |
|                                | WS        | Wind speed (m s <sup>-1</sup> )                             |                                                                                                     |
|                                | RAD       | Shortwave downward radiation (J m <sup>-2</sup> )           |                                                                                                     |
|                                | RH        | Relatively humidity (%)                                     |                                                                                                     |
| Stand Ages                     | Age_EBF   | Stand ages of evergreen broadleaf forests (year)            | <a href="https://doi.org/10.17871/ForestAgeBGI.2021">https://doi.org/10.17871/ForestAgeBGI.2021</a> |
|                                | Age_OP    | Stand ages of oil palms (year)                              | <a href="http://dare.iiasa.ac.at/85/">http://dare.iiasa.ac.at/85/</a>                               |
| CO <sub>2</sub> concentrations | CO2       | Annual CO <sub>2</sub> concentrations (ppm)                 | <a href="https://gml.noaa.gov/dv/data/">https://gml.noaa.gov/dv/data/</a>                           |
